# Supplementary material for: An assessment of acute insecticide toxicity loading (AITL) of chemical pesticides used on agricultural land in the United States
Source: PubMed Central journal article supplement (PMC6684040; doi:10.1371/journal.pone.0220029), 2019-08-06
Supplement: pone.0220029.s001.pdf [file pone.0220029.s001.pdf]

## S1 Appendix. Environmental half-lives and LD<sub>50</sub> values used in AITL assessment

| Active ingredient   | Half-life (days) | Study Type  | Citation | Contact LD50 (µg/bee) | Oral LD50 (µg/bee) | Citation                      |
|---------------------|------------------|-------------|----------|-----------------------|--------------------|-------------------------------|
| Abamectin           | 1                | EU Field    | [1]      | 0.0022                | 0.0063             | [3] [4] [5]                   |
| Acephate            | 3                | EU Field    | [1]      | 1.1                   | 1.4                | [1] [5] [6]                   |
| Acetamiprid         | 3                | EU Field    | [1]      | 8.1                   | 14.8               | [1] [3] [5] [8]               |
| Aldicarb            | 2                | EU Field    | [1]      | 0.31                  | 0.12               | [1] [5] [6] [7] [9]           |
| Aldrin              | 365              | EU Field    | [1]      | 0.35                  | 0.35               | [1] [9] [16]                  |
| Azadirachtin        | 26               | DPR Aerobic | [2]      | 25                    | 8.1                | [4] [5]                       |
| Azinphos-methyl     | 10               | EU Soil     | [1]      | 0.12                  | 0.15               | [1] [5] [15] [24]             |
| Bifenazate          | 4.7              | EU Field    | [1]      | 7.9                   | 110.0              | [3] [5]                       |
| Bifenthrin          | 86.8             | EU Field    | [1]      | 0.074                 | 0.29               | [1] [3] [5] [6]               |
| Carbaryl            | 16               | EU Soil     | [1]      | 0.54                  | 0.18               | [1] [5] [6] [7] [15] [32]     |
| Carbofuran          | 14               | EU Field    | [1]      | 0.12                  | 0.05               | [1] [5] [6] [9]               |
| Chlorantraniliprole | 210              | EU Soil     | [1]      | 100                   | 104                | [1] [3] [5]                   |
| Chlordane           | 365              | EU Soil     | [1]      | 6.9                   | NR                 | [1] [5] [9] [15]              |
| Chlorethoxyphos     | 3                | EU Field    | [1]      | 0.07                  | NR                 | [1] [5]                       |
| Chlorpyrifos        | 21               | EU Field    | [1]      | 0.059                 | 0.25               | [1] [3] [5] [6] [7] [15]      |
| Clothianidin        | 121.2            | EU Field    | [1]      | 0.041                 | 0.0079             | [1] [3] [5] [6] [10]          |
| Cyfluthrin-beta     | 13               | EU Field    | [1]      | 0.013                 | 0.04               | [1] [5] [6] [20]              |
| Cyhalothrin-lambda  | 25               | EU Soil     | [1]      | 0.06                  | 0.26               | [1] [6] [7] [16] [23]         |
| Cypermethrin        | 35               | EU Field    | [1]      | 0.027                 | 0.058              | [1] [3] [5] [6] [7] [18] [19] |

| Active ingredient  | Half-life (days) | Study Type  | Citation | Contact LD50 (µg/bee) | Oral LD50 (µg/bee) | Citation                              |
|--------------------|------------------|-------------|----------|-----------------------|--------------------|---------------------------------------|
| Cypermethrin, zeta | 10               | EU Field    | [1]      | 0.027                 | 0.058              | [1] [3] [5]<br>[6] [7]<br>[18] [19]   |
| DDT                | 6200             | EU Soil     | [1]      | 5.5                   | 5.3                | [5] [6]<br>[15]                       |
| Deltamethrin       | 21               | EU Field    | [1]      | 0.038                 | 0.011              | [1] [3] [5]<br>[6]<br>[7][16]<br>[23] |
| Demeton            | 2.7              | DPR Aerobic | [2]      | 2.6                   | NR                 | [1] [5]                               |
| Diazinon           | 18.4             | EU Field    | [1]      | 0.28                  | 0.17               | [1] [5] [6]<br>[15]                   |
| Dicofol            | 80               | EU Soil     | [1]      | 12                    | 50                 | [1] [5]<br>[15]                       |
| Dicrotophos        | 28               | EU Soil     | [1]      | 0.076                 | 0.068              | [1] [5]<br>[15]                       |
| Dienochlor         | 300              | EU Soil     | [1]      | 36                    | NR                 | [1]                                   |
| Dimethoate         | 7.2              | EU Field    | [1]      | 0.12                  | 0.12               | [1] [5] [6]<br>[7] [15]               |
| Dinotefuran        | 75               | EU Field    | [1]      | 0.03                  | 0.04               | [1] [5] [6]<br>[13]                   |
| Disulfoton         | 30               | EU Soil     | [1]      | 4.5                   | 28                 | [1] [5] [7]<br>[15]                   |
| Emamectin benzoate | 211              | DPR Aerobic | [2]      | 0.0035                | NR                 | [3][5]                                |
| Endosulfan         | 86               | EU Field    | [1]      | 6.7                   | 6.5                | [5] [6] [7]<br>[15]                   |
| Esfenvalerate      | 44               | EU Field    | [1]      | 0.04                  | 0.21               | [1] [3] [5]<br>[6] [21]               |
| Ethion             | 90               | EU Soil     | [1]      | 20.60                 | NR                 | [1] [5]                               |
| Ethoprop           | 23               | EU Field    | [1]      | 4.07                  | NR                 | [1] [3] [5]                           |
| Fenamiphos         | 1.8              | EU Field    | [1]      | 1.08                  | 0.45               | [1] [5]                               |
| Fenbutatin-oxide   | 95               | EU Field    | [1]      | 3982                  | 200                | [1] [5]                               |
| Fenoxycarb         | 5.94             | EU Field    | [1]      | 204                   | 1000               | [1] [3] [5]                           |
| Fenpropathrin      | 28               | EU Field    | [1]      | 0.050                 | NR                 | [1]                                   |
| Fenvalerate        | 40               | EU Soil     | [1]      | 0.32                  | NR                 | [1] [5]<br>[16]                       |
| Fipronil           | 65               | EU Field    | [1]      | 0.009                 | 0.003              | [1] [5] [6]<br>[7]                    |
| Fonofos            | 40               | EU Field    | [1]      | 6.0                   | 8.4                | [1] [5]<br>[15]                       |

| Active ingredient | Half-life (days) | Study Type | Citation | Contact LD50 (µg/bee) | Oral LD50 (µg/bee) | Citation                       |
|-------------------|------------------|------------|----------|-----------------------|--------------------|--------------------------------|
| Hydramethylnon    | 7                | EU Field   | [1]      | 67                    | NR                 | [1] [5]                        |
| Imidacloprid      | 174              | EU Field   | [1]      | 0.043                 | 0.0037             | [1] [3] [5]<br>[6] [7]<br>[11] |
| Indoxacarb        | 20               | EU Field   | [1]      | 0.10                  | 0.18               | [1] [3] [5]                    |
| Isofenphos        | 150              | EU Soil    | [1]      | 0.049                 | NR                 | [5]                            |
| Lindane           | 148              | EU Field   | [1]      | 0.36                  | 0.12               | [1] [5] [6]<br>[15]            |
| Malathion         | 1                | EU Field   | [1]      | 0.21                  | 0.38               | [1] [3] [5]<br>[15]            |
| Methamidophos     | 4                | EU Field   | [1]      | 1.37                  | 0.22               | [1] [9]                        |
| Methidathion      | 7                | EU Field   | [1]      | 0.237                 | NR                 | [1] [5] [9]<br>[11]            |
| Methiocarb        | 35               | EU Field   | [1]      | 0.30                  | 0.47               | [1] [3] [5]<br>[9]             |
| Methomyl          | 7                | EU Soil    | [1]      | 0.47                  | 0.72               | [1] [3] [5]<br>[6] [9]         |
| Methoxychlor      | 120              | EU Soil    | [1]      | 23.6                  | 5.0                | [1] [5]                        |
| Methyl parathion  | 10               | EU Field   | [1]      | 0.22                  | NR                 | [5] [9]<br>[16]                |
| Mevinphos         | 1.2              | EU Soil    | [1]      | 0.07                  | 0.027              | [5] [15]                       |
| Monocrotophos     | 30               | EU Field   | [1]      | 0.36                  | 0.02               | [1] [9]                        |
| Naled             | 1                | EU Soil    | [1]      | 0.48                  | NR                 | [5] [9]                        |
| Oxamyl            | 11               | EU Field   | [1]      | 1.32                  | 0.32               | [1] [5] [7]<br>[9] [15]        |
| Oxydemeton-methyl | 5                | EU Field   | [1]      | 0.90                  | 0.25               | [1] [5] [9]<br>[15]            |
| Parathion         | 17               | EU Field   | [1]      | 0.11                  | NR                 | [5] [9]<br>[23]                |
| Permethrin        | 42               | EU Field   | [1]      | 0.075                 | 0.19               | [1] [5] [6]<br>[7] [9]<br>[15] |
| Phorate           | 63               | EU Field   | [1]      | 0.89                  | 0.44               | [1] [5] [6]<br>[9] [15]        |
| Phosmet           | 7                | EU Field   | [1]      | 0.79                  | 0.37               | [1] [3] [5]<br>[6] [7] [9]     |
| Phosphamidon      | 12               | EU Field   | [1]      | 1.46                  | NR                 | [1] [5] [7]<br>[9]             |
| Pirimicarb        | 9                | EU Field   | [1]      | 35.5                  | 3.7                | [1] [3] [9]<br>[10] [15]       |

| Active ingredient               | Half-life (days) | Study Type  | Citation | Contact LD50 (µg/bee) | Oral LD50 (µg/bee) | Citation            |
|---------------------------------|------------------|-------------|----------|-----------------------|--------------------|---------------------|
| Profenofos                      | 7                | EU Field    | [1]      | 0.095                 | NR                 | [1] [5]             |
| Propargite                      | 16.7             | EU Field    | [1]      | 38                    | 100                | [1] [5]             |
| Pyrethrins                      | 8                | DPR Aerobic | [2]      | 0.094                 | 0.15               | [3] [5] [15]        |
| Pyridaben                       | 29               | EU Field    | [1]      | 0.13                  | 1.58               | [1] [5] [6]         |
| Spinetoram (mixture of J and L) | 16.1             | EU Soil     | [1]      | 0.026                 | 0.082              | [1] [3] [5]         |
| Spinosad (mixture of A and D)   | 14               | DPR Aerobic | [2]      | 0.0038                | 0.055              | [4] [5] [7] [17]    |
| Spirodiclofen                   | 7                | EU Soil     | [1]      | 200                   | 196                | [1] [3] [5]         |
| Spiromesifen                    | 2.1              | EU Field    | [1]      | 200                   | 792                | [1] [5]             |
| Sulfoxaflor                     | 2.2              | EU Soil     | [1]      | 0.23                  | 0.16               | [1] [5] [14] [22]   |
| Tau-fluvalinate                 | 4                | EU Soil     | [1]      | 10                    | 12.6               | [1] [3] [7]         |
| Tefluthrin                      | 27.1             | EU Field    | [1]      | 0.22                  | 1.81               | [1] [3] [5]         |
| Terbufos                        | 12               | EU Field    | [1]      | 0.41                  | 4.09               | [1] [5] [9]         |
| Thiacloprid                     | 18               | EU Field    | [1]      | 26                    | 18                 | [1] [3] [5] [7]     |
| Thiamethoxam                    | 39               | EU Field    | [1]      | 0.015                 | 0.005              | [1] [3] [5] [6] [7] |
| Toxaphene                       | 9                | EU Field    | [1]      | 50                    | 20                 | [5]                 |
| Tralomethrin                    | 3                | EU Soil     | [1]      | 0.13                  | NR                 | [1] [5]             |
| Trichlorfon                     | 18               | EU Soil     | [1]      | 4.40                  | 0.4                | [1] [5] [7] [25]    |

NR: No values identified or reported in the published literature.

## References

- [1] University of Hertfordshire. The Pesticide Properties Data Base (PPDB). Developed by the Agriculture and Environment Research Unit, University of Hertfordshire. Version 2017; Nov 30. Available from: <http://sitem.herts.ac.uk/aeru/ppdb/en/index.htm>.
- [2] Bergin R. 2015 Status report Pesticide Contamination Prevention Act, annual report. CA Department of Pesticide Regulation Report PCPA15. 2016. Available from: [http://www.cdpr.ca.gov/docs/emon/pubs/ehapreps/report\\_pcpa15.pdf](http://www.cdpr.ca.gov/docs/emon/pubs/ehapreps/report_pcpa15.pdf).
- [3] National Institute for Agricultural Research (France). Database on plant protection substances. Agence nationale de sécurité sanitaire de l'alimentation, de l'environnement et du travail 2017;Jun 6. Available from: <http://www.agritox.anses.fr/index2.php>.  
<http://www.agritox.anses.fr/index2.php>.

- [4] BPDB: Bio-Pesticides "FOOTPRINT" database. University of hertfordshire. Available from: <https://sitem.herts.ac.uk/aeru/bpdb/index.htm>.
- [5] US EPA EcoTox. OPP pesticide ecotoxicity database. US Environmental Protection Agency, Regional IPM Centers. 2017. Available from: <http://www.ipmcenters.org/ecotox/DataAccess.cfm>.
- [6] Sanchez-Bayo F, Goka K. (2014). Pesticide Residues and Bees – A Risk Assessment. PLoS ONE 9(4): e94482. doi:10.1371/journal.pone.0094482.
- [7] Arena M, Sgolastra F. (2014). A meta-analysis comparing the sensitivity of bees to pesticides: Database on the LD50 acute and oral and LC50 for honeybees, bumblebees, solitary bees and stingless bees. Ecotoxicology 2014; Electronic supplementary material DOI 10.1007/s10646-014-1190-1. Available from: <https://link.springer.com/article/10.1007%2Fs10646-014-1190-1>.
- [8] US EPA 2005. Acetamiprid new use (cucurbits, stone fruits and tree nuts): Environmental fate and effects risk assessment. US Environmental Protection Agency, Office of Prevention, Pesticides and Toxic Substances, July 27, 2004. Available from: [https://www3.epa.gov/pesticides/chem\\_search/cleared\\_reviews/csr\\_PC-099050\\_27-Jul-05\\_a.pdf](https://www3.epa.gov/pesticides/chem_search/cleared_reviews/csr_PC-099050_27-Jul-05_a.pdf).
- [9] Atkins EL, Kellum D, Atkins KW (1981) Reducing pesticide hazards to honey bees: Mortality prediction and integrated management strategies. Univ Calif Div Agric Sci Leaflet 2883.
- [10] US EPA 2003. Pesticide fact sheet: clothianidin. US Environmental Protection Agency, Office of Prevention, Pesticides and Toxic Substances. May 30, 2003. Available from: [https://www3.epa.gov/pesticides/chem\\_search/reg\\_actions/registration/fs\\_PC-044309\\_30-May-03.pdf](https://www3.epa.gov/pesticides/chem_search/reg_actions/registration/fs_PC-044309_30-May-03.pdf).
- [11] US EPA 1994. Registration for imidacloprid (NTN 33893). US Environmental Protection Agency, Office of Prevention, Pesticides and Toxic Substances. March 10, 1994. Available from: [https://www3.epa.gov/pesticides/chem\\_search/cleared\\_reviews/csr\\_PC-129099\\_10-Mar-94.pdf](https://www3.epa.gov/pesticides/chem_search/cleared_reviews/csr_PC-129099_10-Mar-94.pdf).
- [13] US EPA 2004. Fact sheet: dinotefuran. US Environmental Protection Agency, Office of Prevention, Pesticides and Toxic Substances, September 2004. Available from: <https://nepis.epa.gov/Exe/ZyPURL.cgi?Dockey=P100BIDI.TXT>.
- [14] US EPA 2010. Environmental fate and ecological risk assessment for sulfoxaflor registration. 2010. Sulfoxaflor\_EPA-HQ-OPP-2010-0889-0022.
- [15] Stevenson JH. The acute toxicity of unformulated pesticides to worker honey bees (*Apis mellifera* L.). Plant Pathol. 1978; 27: 38–40. doi: 10.1111/j.1365-3059.1978.tb01070.x.
- [16] International Programme on Chemical Safety (IPCS). INCHEM Database. Last accessed on Dec 19, 2017. Available from: <http://www.inchem.org/>.
- [17] Mayes MA, Thompson GD, Husband B, Miles MM. Spinosad toxicity to pollinators and associated risk. In: Reviews of Environmental Contamination and Toxicology. 2003; Reviews of Environmental Contamination and Toxicology, vol 179. Springer, New York, NY. doi.org/10.1007/0-387-21731-2\_2.
- [18] US EPA, 2008. Revised reregistration eligibility decision (RED): Cypermethrin. US Environmental Protection Agency, Office of Prevention, Pesticides and Toxic Substances. EPA OPP-2005-0293. June 14, 2006, revised January 14, 2008.
- [19] European Food Safety Authority (EFSA). Draft renewal assessment report prepared according to regulation (EC) number 1107/2009 for alpha-cypermethrin. Volume 1, April 2017. Available from: <https://www.efsa.europa.eu/en/consultations/call/170809>.

- [20] European Food Safety Authority (EFSA). Renewal assessment report for beta-cyfluthrin. Volume 1, March 7, 2017. Available from: <https://www.efsa.europa.eu/en/consultations/call/170407>.
- [21] European Food Safety Authority (EFSA). Conclusion on the peer review of the pesticide risk assessment of the active substance esfenvalerate. European Food Safety Authority (EFSA), Parma, Italy. EFSA Journal 2014;12(11):3873. Available from: <https://www.efsa.europa.eu/en/efsajournal/pub/3873>.
- [22] European Food Safety Authority (EFSA). Conclusion on the peer review of the pesticide risk assessment of the active substance sulfoxaflor. European Food Safety Authority (EFSA), Parma, Italy. EFSA Journal 2014;12(5):3692. Available from: <https://www.efsa.europa.eu/en/efsajournal/pub/3692>.
- [23] EXTTOXNET. The Extension Toxicology Network. EXTTOXNET is a cooperative effort of University of California-Davis, Oregon State University, Michigan State University, Cornell University, and the University of Idaho. Available from: <http://exttoxnet.orst.edu/>.
- [24] Danka RG, Rindere TE, Hellmich RL, Collins AM. Comparative toxicities of four topically applied insecticides to Africanized and European honey bees (Hymenoptera: Apidae). J Econ Entomol. 1986; 79: 18-21.
- [25] Ahmad Z, Johansen, CA. Selective toxicity of carbophenothion and trichlophon to the honey bee and the alfalfa-cutting bee. Environ Entomol. 1973; 2:27-30.
