# Supplementary material for: An assessment of acute insecticide toxicity loading (AITL) of chemical pesticides used on agricultural land in the United States
Source: PubMed Central journal article supplement (PMC6684040; doi:10.1371/journal.pone.0220029), 2019-08-06
Supplement: pone.0220029.s002.pdf [file pone.0220029.s002.pdf]

**S2 Appendix. Representative lowest observed effect concentrations (LOEC) for neonicotinoid sublethal toxicity in honey bees.**

| Neonicotinoid (a.i.) | Test Doses                                        | Mode of Exposure | Time of exposure      | LOEC        | Endpoint                                                                                                          | Study Type           | Reference |
|----------------------|---------------------------------------------------|------------------|-----------------------|-------------|-------------------------------------------------------------------------------------------------------------------|----------------------|-----------|
| Acetamiprid          | 0, 0.1, 0.5, 1.0 µg/bee                           | Oral             | Acute                 | ≤100 ng/bee | Impaired long-term retention of olfactory learning                                                                | Laboratory           | [1, 2]    |
| Acetamiprid          | 0, 0.1, 1.0 µg/bee                                | Oral             | Acute 24 hrs          | ≤100 ng/bee | Increase in responsiveness to water                                                                               | Laboratory           | [2]       |
| Acetamiprid          | 0, 0.1, 0.5, 1.0 µg/bee                           | Topical          | Acute                 | ≤100 ng/bee | Increased locomotor activity and water-induced proboscis extension reflex                                         | Laboratory           | [1]       |
| Clothianidin         | 0, 0.1, 0.5, 1.0, 2.0 ng/bee                      | Oral             | Acute 30-90 min       | 0.5 ng/bee  | Significant change in locomotor activity                                                                          | Laboratory           | [3]       |
| Clothianidin         | 0, 0.06, 0.3, 0.6, 0.9, 3.0, 6.0, and 12.0 ng/bee | Oral             | Acute                 | 0.9 ng/bee  | Changes specificity of the early long-term memory (24 h)                                                          | Laboratory           | [3]       |
| Clothianidin         | 0, 0.03, 0.06, 0.12, 0.24 ng/bee                  | Oral             | Chronic up to 4 weeks | 0.12 ng/bee | Increased AChE activity with associated hyperactivity and decreased survival                                      | Laboratory and Field | [4]       |
| Clothianidin         | 0, 0.05, 0.5, 1.0, 2.0 ng/bee                     | Oral             | Acute, single dose    | 0.5 ng/bee  | Increase the time spent at feeder, flight time to feeder or to hive, time in hive between trips and trip duration | Field                | [5]       |
| Clothianidin         | 0, 2.5 ng/bee                                     | Oral             | Acute                 | ≤2.5 ng/bee | Modifications in the length and directional components of vector flight and homing flight                         | Field                | [6]       |
| Clothianidin         | 0.545-10.9 ng/bee                                 | Topical          | Acute 30 minutes      | 2.18 ng/bee | Reduction in successful homing flight                                                                             | Field                | [7]       |

| Neonicotnoid (a.i.) | Test Doses                       | Mode of Exposure | Time of exposure        | LOEC                   | Endpoint                                                                                                          | Study Type           | Reference |
|---------------------|----------------------------------|------------------|-------------------------|------------------------|-------------------------------------------------------------------------------------------------------------------|----------------------|-----------|
| Dinotefuran         | 0, 1.9-37.5 ng/bee               | Topical          | Acute<br>30 minutes     | 7.5 ng/bee             | Reduction in successful homing flight                                                                             | Field                | [7]       |
| Imidacloprid        | 0, 10, 100, 1000 $\mu$ M         | Oral             | Subchronic<br>6 days    | 1.3 ng/bee             | Impairment of various aspects of olfactory learning and memory formation                                          | Laboratory           | [8]       |
| Imidacloprid        | 0, 2, 10 ng/bee                  | Oral             | Acute, a few hours      | $\leq$ 2 ng/bee        | Reduction in mobility (moving time ratio and the speed of movements)                                              | Laboratory           | [9]       |
| Imidacloprid        | 0, 0.1, 1.0 ng/bee               | Oral             | NR                      | $\leq$ 0.1 ng/bee      | Impairment of olfactory learning                                                                                  | Laboratory           | [10]      |
| Imidacloprid        | 0, 0.1, 1.0 ng/bee               | Oral             | Acute<br>4 hrs          | $\leq$ 0.1 ng/bee      | Changed in the number of trials to habituation in an age-dependent manner                                         | Laboratory           | [11]      |
| Imidacloprid        | 0, 0.01, 0.1, and 1.0 ng/bee     | Oral             | Subchronic<br>8-10 days | 0.1 ng/bee             | Increased mortality of workers                                                                                    | Laboratory           | [12]      |
| Imidacloprid        | $\sim$ 0.8-81 ng/bee             | Oral             | Chronic                 | $\sim$ $\leq$ 1 ng/bee | Altered foraging behavior                                                                                         | Laboratory           | [13]      |
| Imidacloprid        | 0, 0.21, 2.16 ng/bee             | Oral             | Acute<br>1 - 24 hrs     | $\leq$ 0.21 ng/bee     | Higher sucrose response thresholds (1 hr) and a reduction in waggle dance circuits (24 hrs)                       | Laboratory           | [14]      |
| Imidacloprid        | 0, 0.453 ng/bee                  | Oral             | Acute<br>24 hrs         | $\leq$ 0.453 ng/bee    | Disruption of the righting reflex and increased grooming                                                          | Laboratory           | [15]      |
| Imidacloprid        | 0, 0.08, 0.16, 0.24, 0.30 ng/bee | Oral             | Chronic up to 4 weeks   | $\leq$ 0.08 ng/bee     | Increased AChE activity with associated hyperactivity and decreased survival                                      | Laboratory and Field | [4]       |
| Imidacloprid        | 0, 0.15, 1.5, 3.0, 6.0 ng/bee    | Oral             | Acute, single dose      | 1.5 ng/bee             | Increase the time spent at feeder, flight time to feeder or to hive, time in hive between trips and trip duration | Field                | [5]       |

| Neonicotinoid (a.i.) | Test Doses                           | Mode of Exposure | Time of exposure  | LOEC                                 | Endpoint                                                                                                                                | Study Type | Reference |
|----------------------|--------------------------------------|------------------|-------------------|--------------------------------------|-----------------------------------------------------------------------------------------------------------------------------------------|------------|-----------|
| Imidacloprid         | 0, 7.5, 11.25 ng/bee                 | Oral             | Acute             | $\leq 7.5$ ng/bee                    | Modifications in the length and directional components of vector flight and homing flight                                               | Field      | [6]       |
| Imidacloprid         | 0, 1.25, 2.5, 5, 10, and 20 ng/bee   | Topical          | Acute             | $\leq 1.25$ $\mu\text{g}/\text{bee}$ | increases the motor activity and facilitates the PER habituation independently of time.                                                 | Laboratory | [16]      |
| Thiacloprid          | 0, 1.25 $\mu\text{g}/\text{bee}$     | Oral             | Acute             | $\leq 1.25$ $\mu\text{g}/\text{bee}$ | Modifications in the length and directional components of vector flight and homing flight                                               | Field      | [6]       |
| Thiamethoxam         | 0, 1.3 ng/bee                        | Oral             | NR                | $\leq 1.3$ ng/bee                    | Locomotor deficit                                                                                                                       | Laboratory | [17]      |
| Thiamethoxam         | 0, 0.428, 4.28 ng/bee                | Oral             | Subchronic 8 days | $\leq 0.428$ ng/bee                  | Condensed cells in mushroom bodies and optical lobes, cytoplasm vacuolization, increased apocrine secretion, increased cell elimination | Laboratory | [18]      |
| Thiamethoxam         | 0, 1.34 ng/bee                       | Oral             | Acute             | $\leq 1.34$ ng/bee                   | Reduction in successful homing flight and increased mortality for foragers                                                              | Field      | [19]      |
| Thiamethoxam         | 0, 1.95, 2.90, 3.71, and 4.53 ng/bee | Oral             | Acute (1-48 hrs)  | $\leq 1.96$ ng/bee                   | Decreased flight duration, distance, and average velocity                                                                               | Field      | [20]      |
| Thiamethoxam         | 0, 3.8 ng/bee                        | Topical          | NR                | $\leq 3.8$ ng/bee                    | Locomotor deficit                                                                                                                       | Laboratory | [17]      |
| Thiamethoxam         | 0, 0.1, 1.0 ng/bee                   | Topical          | Acute 24 hrs      | $\leq 0.1$ ng/bee                    | Significant decrease of olfactory memory                                                                                                | Laboratory | [2]       |
| Thiamethoxam         | 0, 2.56, 5.12, 51.2 ng/bee           | Topical          | Acute 48 hours    | $\leq 2.56$ ng/bee                   | Changes in biochemical markers for toxicity                                                                                             | Laboratory | [21]      |

## References

1. El Hassani A, Dacher M, Vincent G, Lambin M, Gauthier M, Armengaud C. Effects of sublethal doses of acetamiprid and thiamethoxam on the behavior of the honeybee (*Apis mellifera*). *Arch Environ Contam Toxicol*. 2008;54:653–61. doi: 10.1007/s00244-007-9071-8.
2. Aliouane Y, El Hassani AK, Gary V, Armengaud C, Lambin M, Gauthier M. Subchronic exposure of honeybees to sublethal doses of pesticides: effects on behavior. *Environ Toxicol Chem*. 2009;28(1):113-22. doi: 10.1897/08-110.1.
3. Alkassab AT, Kirchner WH. Assessment of acute sublethal effects of clothianidin on motor function of honeybee workers using video-tracking analysis. *Ecotoxicol Environ Saf*. 2018;147:200-5. doi: 10.1016/j.ecoenv.2017.08.047.
4. Boily M, Sarrasin B, Deblois C, Aras P, Chagnon M. Acetylcholinesterase in honey bees (*Apis mellifera*) exposed to neonicotinoids, atrazine and glyphosate: laboratory and field experiments. *Environ Sci Pollut Res Int*. 2013;20(8):5603-14. doi: 10.1007/s11356-013-1568-2.
5. Schneider CW, Tautz J, Grunewald B, Fuchs S. RFID tracking of sublethal effects of two neonicotinoid insecticides on the foraging behavior of *Apis mellifera*. *PLoS One*. 2012;7(1):e30023. doi: 10.1371/journal.pone.0030023.
6. Fischer J, Muller T, Spatz AK, Greggers U, Grunewald B, Menzel R. Neonicotinoids interfere with specific components of navigation in honeybees. *PLoS One*. 2014;9(3):e91364. doi: 10.1371/journal.pone.0091364.
7. Matsumoto T. Reduction in homing flights in the honey bee *Apis mellifera* after a sublethal dose of neonicotinoid insecticides. *Bull Insect*. 2013;66(1):1-9.
8. Williamson SM, Wright GA. Exposure to multiple cholinergic pesticides impairs olfactory learning and memory in honeybees. *J Exp Biol*. 2013;216(Pt 10):1799-807. doi: 10.1242/jeb.083931.
9. Medrzycki P, Montanari R, Bortolotti L, Sabatini A, Maini S, Porrin C. Effects of imidacloprid administered in sub-lethal doses on honey bee behaviour. Laboratory tests. *Bull Insect*. 2003; 56(1):59-62.
10. Tan K, Chen W, Dong S, Liu X, Wang Y, Nieh JC. A neonicotinoid impairs olfactory learning in Asian honey bees (*Apis cerana*) exposed as larvae or as adults. *Sci Rep*. 2015;5:10989. doi: 10.1038/srep10989.
11. Guez D, Suchail S, Gauthier M, Maleszka R, Belzunces LP. Contrasting effects of imidacloprid on habituation in 7- and 8-day-old honeybees (*Apis mellifera*). *Neurobiol Learn Mem*. 2001;76(2):183-91. doi: 10.1006/nlme.2000.3995.
12. Suchail S, Guez D, Belzunces LP. Discrepancy between acute and chronic toxicity induced by imidacloprid and its metabolites in *Apis mellifera*. *Environ Toxicol Chem*. 2001;20(11):2482-6.
13. Yang EC, Chuang YC, Chen YL, Chang LH. Abnormal foraging behavior induced by sublethal dosage of imidacloprid in the honey bee (Hymenoptera: Apidae). *J Econ Entomol*. 2008;101(6):1743-8. doi: 10.1603/0022-0493-101.6.1743.
14. Eiri DM, Nieh JC. A nicotinic acetylcholine receptor agonist affects honey bee sucrose responsiveness and decreases waggle dancing. *J Exp Biol*. 2012;215(Pt 12):2022-9. doi: 10.1242/jeb.068718.

15. Williamson SM, Willis SJ, Wright GA. Exposure to neonicotinoids influences the motor function of adult worker honeybees. *Ecotoxicology*. 2014;23(8):1409-18. doi: 10.1007/s10646-014-1283-x.
16. Lambin M, Armengaud C, Raymond S, Gauthier M. Imidacloprid-induced facilitation of the proboscis extension reflex habituation in the honeybee. *Arch Insect Biochem Physiol*. 2001;48(3):129-34. doi: 10.1002/arch.1065.
17. Charreton M, Decourtye A, Henry M, Rodet G, Sandoz JC, Charnet P, et al. A Locomotor Deficit Induced by Sublethal Doses of Pyrethroid and Neonicotinoid Insecticides in the Honeybee *Apis mellifera*. *PLoS One*. 2015;10(12):e0144879. doi: 10.1371/journal.pone.0144879.
18. Oliveira R, Roat T, Carvalho S, O M. Side-effects of thiamethoxam on the brain and midgut of the africanized honeybee *Apis mellifera* (Hymenoptera: Apidae). *Environ Toxicol*. 2014 Oct 29(10):1122-33. Epub Epub 2013 Jan 22. doi: 10.1002/tox.21842.
19. Henry M, Beguin M, Requier F, Rollin O, Odoux JF, Aupinel P, et al. A common pesticide decreases foraging success and survival in honey bees. *Science*. 2012;336(6079):348-50. doi: 10.1126/science.1215039.
20. Tosi S, Burgio G, Nieh JC. A common neonicotinoid pesticide, thiamethoxam, impairs honey bee flight ability. *Sci Rep*. 2017;7(1):1201. doi: 10.1038/s41598-017-01361-8.
21. Badiou-Beneteau A, Carvalho SM, Brunet JL, Carvalho GA, Bulete A, Giroud B, et al. Development of biomarkers of exposure to xenobiotics in the honey bee *Apis mellifera*: application to the systemic insecticide thiamethoxam. *Ecotoxicol Environ Saf*. 2012;82:22-31. doi: 10.1016/j.ecoenv.2012.05.005.
